# Supplementary material for: A Comparison of Two Types of Rabbit Antithymocyte Globulin Induction Therapy in Immunological High-Risk Kidney Recipients: A Prospective Randomized Control Study
Source: PLoS One. 2016 Nov 17;11(11):e0165233. doi: 10.1371/journal.pone.0165233 (PMC5113896; doi:10.1371/journal.pone.0165233)
Supplement: S1 Table — (PDF) [file pone.0165233.s003.pdf]

| COUNTRY |     | CITY |     | DATE |     |
|---------|-----|------|-----|------|-----|
| 1       | 1   | 1    | 1   | 1    | 1   |
| 2       | 2   | 2    | 2   | 2    | 2   |
| 3       | 3   | 3    | 3   | 3    | 3   |
| 4       | 4   | 4    | 4   | 4    | 4   |
| 5       | 5   | 5    | 5   | 5    | 5   |
| 6       | 6   | 6    | 6   | 6    | 6   |
| 7       | 7   | 7    | 7   | 7    | 7   |
| 8       | 8   | 8    | 8   | 8    | 8   |
| 9       | 9   | 9    | 9   | 9    | 9   |
| 10      | 10  | 10   | 10  | 10   | 10  |
| 11      | 11  | 11   | 11  | 11   | 11  |
| 12      | 12  | 12   | 12  | 12   | 12  |
| 13      | 13  | 13   | 13  | 13   | 13  |
| 14      | 14  | 14   | 14  | 14   | 14  |
| 15      | 15  | 15   | 15  | 15   | 15  |
| 16      | 16  | 16   | 16  | 16   | 16  |
| 17      | 17  | 17   | 17  | 17   | 17  |
| 18      | 18  | 18   | 18  | 18   | 18  |
| 19      | 19  | 19   | 19  | 19   | 19  |
| 20      | 20  | 20   | 20  | 20   | 20  |
| 21      | 21  | 21   | 21  | 21   | 21  |
| 22      | 22  | 22   | 22  | 22   | 22  |
| 23      | 23  | 23   | 23  | 23   | 23  |
| 24      | 24  | 24   | 24  | 24   | 24  |
| 25      | 25  | 25   | 25  | 25   | 25  |
| 26      | 26  | 26   | 26  | 26   | 26  |
| 27      | 27  | 27   | 27  | 27   | 27  |
| 28      | 28  | 28   | 28  | 28   | 28  |
| 29      | 29  | 29   | 29  | 29   | 29  |
| 30      | 30  | 30   | 30  | 30   | 30  |
| 31      | 31  | 31   | 31  | 31   | 31  |
| 32      | 32  | 32   | 32  | 32   | 32  |
| 33      | 33  | 33   | 33  | 33   | 33  |
| 34      | 34  | 34   | 34  | 34   | 34  |
| 35      | 35  | 35   | 35  | 35   | 35  |
| 36      | 36  | 36   | 36  | 36   | 36  |
| 37      | 37  | 37   | 37  | 37   | 37  |
| 38      | 38  | 38   | 38  | 38   | 38  |
| 39      | 39  | 39   | 39  | 39   | 39  |
| 40      | 40  | 40   | 40  | 40   | 40  |
| 41      | 41  | 41   | 41  | 41   | 41  |
| 42      | 42  | 42   | 42  | 42   | 42  |
| 43      | 43  | 43   | 43  | 43   | 43  |
| 44      | 44  | 44   | 44  | 44   | 44  |
| 45      | 45  | 45   | 45  | 45   | 45  |
| 46      | 46  | 46   | 46  | 46   | 46  |
| 47      | 47  | 47   | 47  | 47   | 47  |
| 48      | 48  | 48   | 48  | 48   | 48  |
| 49      | 49  | 49   | 49  | 49   | 49  |
| 50      | 50  | 50   | 50  | 50   | 50  |
| 51      | 51  | 51   | 51  | 51   | 51  |
| 52      | 52  | 52   | 52  | 52   | 52  |
| 53      | 53  | 53   | 53  | 53   | 53  |
| 54      | 54  | 54   | 54  | 54   | 54  |
| 55      | 55  | 55   | 55  | 55   | 55  |
| 56      | 56  | 56   | 56  | 56   | 56  |
| 57      | 57  | 57   | 57  | 57   | 57  |
| 58      | 58  | 58   | 58  | 58   | 58  |
| 59      | 59  | 59   | 59  | 59   | 59  |
| 60      | 60  | 60   | 60  | 60   | 60  |
| 61      | 61  | 61   | 61  | 61   | 61  |
| 62      | 62  | 62   | 62  | 62   | 62  |
| 63      | 63  | 63   | 63  | 63   | 63  |
| 64      | 64  | 64   | 64  | 64   | 64  |
| 65      | 65  | 65   | 65  | 65   | 65  |
| 66      | 66  | 66   | 66  | 66   | 66  |
| 67      | 67  | 67   | 67  | 67   | 67  |
| 68      | 68  | 68   | 68  | 68   | 68  |
| 69      | 69  | 69   | 69  | 69   | 69  |
| 70      | 70  | 70   | 70  | 70   | 70  |
| 71      | 71  | 71   | 71  | 71   | 71  |
| 72      | 72  | 72   | 72  | 72   | 72  |
| 73      | 73  | 73   | 73  | 73   | 73  |
| 74      | 74  | 74   | 74  | 74   | 74  |
| 75      | 75  | 75   | 75  | 75   | 75  |
| 76      | 76  | 76   | 76  | 76   | 76  |
| 77      | 77  | 77   | 77  | 77   | 77  |
| 78      | 78  | 78   | 78  | 78   | 78  |
| 79      | 79  | 79   | 79  | 79   | 79  |
| 80      | 80  | 80   | 80  | 80   | 80  |
| 81      | 81  | 81   | 81  | 81   | 81  |
| 82      | 82  | 82   | 82  | 82   | 82  |
| 83      | 83  | 83   | 83  | 83   | 83  |
| 84      | 84  | 84   | 84  | 84   | 84  |
| 85      | 85  | 85   | 85  | 85   | 85  |
| 86      | 86  | 86   | 86  | 86   | 86  |
| 87      | 87  | 87   | 87  | 87   | 87  |
| 88      | 88  | 88   | 88  | 88   | 88  |
| 89      | 89  | 89   | 89  | 89   | 89  |
| 90      | 90  | 90   | 90  | 90   | 90  |
| 91      | 91  | 91   | 91  | 91   | 91  |
| 92      | 92  | 92   | 92  | 92   | 92  |
| 93      | 93  | 93   | 93  | 93   | 93  |
| 94      | 94  | 94   | 94  | 94   | 94  |
| 95      | 95  | 95   | 95  | 95   | 95  |
| 96      | 96  | 96   | 96  | 96   | 96  |
| 97      | 97  | 97   | 97  | 97   | 97  |
| 98      | 98  | 98   | 98  | 98   | 98  |
| 99      | 99  | 99   | 99  | 99   | 99  |
| 100     | 100 | 100  | 100 | 100  | 100 |
